1 **Full title:** Early life factors associated with childhood trajectories of violence among the Birth to  
2 Twenty-Plus Cohort in Soweto, South Africa.

3 **Short title:** Early life factors associated with childhood trajectories of violence.

4 Lilian Muchai<sup>1¶</sup>, Sara Naicker<sup>2¶</sup>, Juliana Kagura<sup>1¶</sup>

5

6 <sup>1</sup> School of Public Health, Faculty of Health Sciences, University of the Witwatersrand,  
7 Johannesburg, Gauteng, South Africa

8 <sup>2</sup> DSI-NRF Centre of Excellence in Human Development, University of the Witwatersrand,  
9 Johannesburg, Gauteng, South Africa

10

11 \*Corresponding author

12 Email: [muchailily@gmail.com](mailto:muchailily@gmail.com) (LM)

13

## 14 **Abstract**

15 Violence against children (VAC) has devastating and long-term negative consequences on  
16 individuals' and society's health, social and economic well-being. There is limited research on the life  
17 course experience of VAC, especially in Africa. This study aimed to identify sub-groups of physical  
18 & sexual violence victimization patterns separately in childhood, and evaluate early life factors  
19 predicting violence trajectories. This study used data from ages 5 to 18 years from the ongoing  
20 prospective Birth to Twenty Plus cohort (Bt20+). Children with data on physical and sexual violence  
21 in at least 2-time points between 5 and 18 years were included in the analyses. Group-based

22 trajectory modelling was employed to identify groups of children with similar patterns of violence  
23 over time, while multivariable logistic regression was used to identify early life factors associated  
24 with violence trajectory group membership. Separately, two trajectory groups of physical violence  
25 (adolescent limited (65.1%) and chronic increasing (34.9%)) and sexual violence (adolescent limited  
26 (74.1%) and late increasing (25.9%)) victimization were identified. Early life factors associated with  
27 a higher risk of chronic increasing trajectory group membership, after adjusting for covariates, were  
28 being male (aOR 1.67, 95% CI 1.31; 2.10) and having a mother with at least secondary education  
29 compared to higher education (aOR 1.73, 95% CI 1.08; 2.76). In addition, residing in middle,  
30 compared to low, socioeconomic households (aOR 0.68, 95% CI 0.50; 0.92) was protective against  
31 membership in this group. Residing in high compared to low socioeconomic households, was the  
32 only early life factor with marginally significant (aOR 0.63, 95% CI 0.42; 0.95) association with  
33 membership in the late-increasing sexual violence victimization trajectory group. In conclusion,  
34 children follow different violence victimization trajectories over childhood. Identifying early life  
35 factors predicting violence trajectories provides key prevention intervention areas that can mitigate  
36 children's violence experience.

37 **Keywords:** Physical violence; sexual violence; trajectories; early life;

38  
39  
40  
41  
42  
43  
44  
45  
46

## 47 **Introduction**

48 Globally, more than half of children between the ages of 2 and 17 years reported having experienced  
49 some type of violence each year, in a systematic review on the global prevalence of childhood  
50 violence, which included reports published between the years 2000 and 2013 [1]. Africa bears the  
51 biggest brunt of violence against children (VAC), with the prevalence of physical violence at 60%  
52 and 51% for girls and boys respectively [2]. Violence is endemic to South Africa, particularly  
53 associated with structural and systemic violence originating from the Apartheid period. A nationally  
54 representative survey among children 15–17 years of age reported that almost 20% of children had  
55 experienced some form of sexual abuse, 21.3% experienced neglect, and over 30% and 16%  
56 experienced physical and emotional abuse respectively [3]. Children are likely to experience  
57 different forms of violence at different stages of their lives, as their environments and interactions  
58 change [4]. This ranges from violent discipline during early childhood by caregivers, bullying by  
59 peers at school, sexual violence victimization and intimate partner violence during the adolescent  
60 period – although the boundaries of these timeframes are porous [5,6]. A study conducted among  
61 children followed up from birth to 22 years in Soweto, found that 36% of children were exposed to  
62 violence at home, in the community, at school, peer violence and were victims of interpersonal  
63 violence [7].

64 Despite mounting evidence of determinants and the burden of VAC, few studies have demonstrated  
65 the effects of life course exposure to multiple forms of violence, and even fewer studies have  
66 identified the different clusters of violence patterns (trajectories) over time. Previous studies, carried  
67 out in developed countries have demonstrated heterogeneity in the number and shapes of trajectories  
68 of physical and/ or sexual violence victimization, with two [8,9] three [8,10], four [11] and five [12]  
69 trajectory groups identified. The majority of these studies assess trajectories of violence  
70 victimization as predictors of subsequent physical and mental health outcomes in adulthood, rather

71 than the identification of risk factors for trajectory group membership. Most studies assessing risk  
72 factors for violence trajectory group membership in childhood tend to focus on violence aggression  
73 or perpetration. However, a significant overlap between victimization and perpetration experiences  
74 documented in research [13–16], show that victims and perpetrators share similar contextual features  
75 that place them at an increased risk for violence victimization and perpetration.

76 Several demographic and early life factors have been associated with violence trajectories. Being  
77 male, residing in households with low socioeconomic status, early motherhood, having more than  
78 one child in the household, single parenthood and low parental education were some of the risk  
79 factors identified for membership in high or life course persistent physical violence victimization or  
80 aggression trajectory groups [11,17–19]. From cross-sectional analyses conducted in both developing  
81 and developed countries, early life factors predicting violence victimization include, household  
82 crowding [20], paternal absence [21] and mother’s prior history of violence [22,23]. Both low [24]  
83 and high birth weight [25,26], and catch-up growth (weight and length) in infancy (0-2 years) are  
84 documented to predict future overweight and obesity [27,28], which are risk factors for violence  
85 victimization [29–31].

86 There is a dearth of studies conducted in Africa assessing factors associated with childhood  
87 trajectories of violence due to a lack of longitudinal data on violence. This limits the ability to assess  
88 the developmental course of violence and the heterogeneity of violence trajectories in populations  
89 outside of the Global North. This is paramount towards the identification, development and  
90 implementation of context-specific prevention strategies prior to the child’s exposure or experience  
91 of violence. The current study aims to generate physical and sexual violence victimization  
92 trajectories across childhood and assess how factors in early life predict membership into specific  
93 violence trajectories.

## 94 **Materials and methods**

### 95 **Study setting and site**

96 The primary study (Birth to Twenty plus study, Bt20+) is an ongoing prospective birth cohort study  
97 that follows singleton children born between April 23 to June 8, 1990 in public health facilities in  
98 Soweto, South Africa. Soweto is a densely populated suburb located within the Johannesburg  
99 metropolitan municipality in Gauteng province in South Africa. This primary study included  
100 pregnant women attending public antenatal clinics with expected delivery dates within the above-  
101 mentioned dates, and later continued residence of the mother and the baby within the study area  
102 during the child's first six months of life. Data collected in the Bt20+ study is multidisciplinary,  
103 tracking infant, child, adolescent and now adult physical, social and psychosocial well-being [32]. Of  
104 3,273 children enrolled at the beginning of the study, follow-up has been conducted bi-annually  
105 through home, study sites or through school surveys. Full descriptions of the Bt20+ cohort, its  
106 attrition and methods have been published elsewhere [32,33].

### 107 **Study design**

108 This study involved secondary data analysis of the prospective Bt20+ cohort study. Only data from  
109 birth until 18 years covering (1990 – 2018) from the primary study was included in this secondary  
110 study.

### 111 **Study population and sample**

112 The study population included all children from birth to 18 years from the primary ongoing  
113 prospective Bt20+ cohort study. This cohort of children is almost representative of the South African  
114 population, with a higher percentage of black Africans. However, there was a slight under-  
115 representation of white families [32].

116 From the 19 waves of data collection between birth to 18 years, there were only four time points,  
117 year 5, 11, 15 and 18, that had sufficient data on physical and sexual violence victimization. Data  
118 from data collection waves where physical and sexual violence data was combined were excluded  
119 from the analyses since trajectories were generated separately for physical & sexual violence  
120 victimization. Children in the study population with data on physical and sexual violence in at least 2  
121 of the 4-time points were included in this study.

## 122 **Study variables**

123 **Outcome variable.** Two outcome variables namely; physical and sexual violence victimization  
124 were considered for this study. For the early years, from age 5 to 10 years, the primary caregiver  
125 reported on the experiences of the participant, from age 11 onwards, experiences were self-reported.

126 Physical violence victimization was coded as a binary variable (yes/no) generated from questions on  
127 any experience of physical violence in the previous 12 months based on the following 4 categories:  
128 at home, at school, in the neighbourhood and at work (only year 18). The questions separately  
129 assessed for each of the four categories above included: have you been (a) physically hurt; (b) hit ;(c)  
130 kicked; (d) badly beaten up; (e) attacked with a knife or sharp object. Responses to each of these  
131 questions were never, once or twice, few times and many times. The responses were recoded to a  
132 dichotomous variable with responses no, coded '0' (never) and yes, coded '1' (once or twice, few  
133 times and many times combined). A positive yes to any of the 5 questions for each of the 4  
134 categories mentioned above was coded as having been a victim of physical violence (yes) for that  
135 specific time point of data collection.

136 Sexual violence victimization similar to the first outcome above was coded as a binary outcome of  
137 sexual violence experience in the preceding 12 months based on the categories (at home, at school, in  
138 the neighbourhood and at work) for questions a and b below. Questions c to g were not based on the

139 specified categories. Sexual violence in the primary study was defined as unwanted sexual  
140 experiences. Questions included: have you been (a) sexually assaulted/ attacked (b) sexually  
141 harassed (c) wanted to engage in oral sex (d) wanted to have oral sex last month (e) wanted to have  
142 sex (f) wanted to have sex last month (g) wanted to engage in heavy petting or foreplay. Responses to  
143 questions a and b were never, once or twice, a few times or many times. These were recoded to no,  
144 coded '0' (never) and yes, coded '1' (once or twice, a few times and many times). Yes or no  
145 responses were recorded for questions c, d, e, f and g. Questions c to g were limited to children who  
146 had engaged in sex. These questions were recoded, where a no response, meaning for example that  
147 the individual did not want to engage in sex was recoded yes, coded '1' to having been sexually  
148 assaulted. A yes response to question c, d, e, f and g was recoded no, coded '0', to mean that the  
149 child had not been sexually assaulted. A positive yes to any of the questions above was coded as  
150 having been a victim of sexual violence (yes).

151 For details on the proportions of physical and sexual violence across the given time points please  
152 refer to supplementary table 1

153 **Risk factors of interest.** Early life factors measured between birth and 5 years associated with  
154 violence experience were selected based on aprior knowledge and literature, as well as data  
155 availability. These were selected as correlates for physical and sexual violence victimization  
156 trajectories and grouped into individual and family level factors.

157 *Individual / Child- level factors:* Birthweight was obtained from birth notifications and categorized  
158 as low birthweight (less than 2,500 grams) or normal birthweight (2,500 grams or higher). Relative  
159 weight gain and relative height gain were derived as standardized residuals computed from sex-  
160 specific linear regression of these growth changes measured between infancy (0-2) and early  
161 childhood (2-5 years).

162 *Family level factors:* Household socioeconomic status was based on total household asset scores,  
163 grouped into tertiles of low (coded ‘1’), middle (coded ‘2’) and high (coded ‘3’) socioeconomic  
164 status. Examples of some of the household assets included possession of a television, refrigerator,  
165 washing machine and a car. Household crowding was recorded as a ratio of persons per sleeping  
166 room, this was recoded to yes (‘1’) and no (‘0’). Household crowding was defined as households  
167 whose ratio was equal to or above the total sample household crowding ratio mean. Maternal age  
168 was recorded at birth and grouped for analysis - 24 years and below (coded ‘0’), between 25 and 34  
169 years (coded ‘1’) and above 35 years (coded ‘2’) at the time of birth. Parity was coded as only child  
170 from mother (coded ‘0’) or mother had more than one child (coded ‘1’). Maternal and paternal  
171 education was categorized as primary school and below (coded ‘0’), secondary school (coded ‘1’),  
172 and post-school training (diploma, bachelors, masters or doctoral degrees, coded ‘2’). Marital status  
173 was recorded as married, living together, widowed/ divorced or single. This was recoded to married  
174 (married & living together, coded ‘1’) and single (widowed/divorced and single, coded ‘0’). Father’s  
175 presence in the household was coded as yes (‘1’) or no (‘0’). Maternal prior violence experience was  
176 derived using data from 2 variables. Any positive (yes) response on either mother’s prior violence in  
177 childhood or intimate partner violence during pregnancy was coded as mother having experienced  
178 violence (yes, coded ‘1’). Finally, mode of delivery obtained from birth notifications was recoded to  
179 normal vaginal delivery (‘0’) or assisted (caesarian section/ use of forceps or vacuum) delivery (‘1’).

## 180 **Data management and analysis**

181 De-identified electronic data from the Birth to Twenty Plus study database was accessed on the 20<sup>th</sup>  
182 of April 2023 following the ethical approval of this research. These data were imported into Stata 17  
183 for cleaning and analysis. Only data on early life factors between the antenatal period to 5 years of  
184 age and data on physical and sexual violence victimization between ages 5 to 18 years were extracted



185 from the primary Bt20+ database. The data was checked for missing and duplicate values, followed  
186 by recoding and generation of new variables. No duplicates were identified and the final study  
187 dataset was stored in a password-protected file for analyses.

188 **Identification of trajectory groups:** Group based trajectory modelling (GBTM) was used to  
189 identify clusters of children with similar violence victimization trajectories from age 5 to 18 years.  
190 GBTM is a semiparametric group strategy that applies finite mixture models to identify clusters of  
191 persons (trajectory groups) with similar developmental course of an outcome over time [34,35]. This  
192 technique assumes that the population is composed of distinct groups defined by their outcome  
193 progression over time and makes no assumptions about the population distribution of the trajectories  
194 [34]. Determination of the number of trajectory groups that best fit the data was based on the most  
195 parsimonious model determined by lowest Bayesian Information Criterion (BIC) and high entropy  
196 after comparison of two and three-group models. Linear, quadratic and cubic polynomial orders were  
197 tested to identify the polynomial order that best characterized the evolution of violence victimization  
198 over time. The logit function reflecting the Bernoulli distribution of the outcome was specified in all  
199 the models tested. The final model was selected based on theoretical plausibility, average posterior  
200 probabilities of trajectory group membership greater than the set threshold of 0.70, highest entropy  
201 and group membership greater than 10% [34]. All trajectory analyses were conducted using the stata  
202 plug-in Traj [36].

203 **Early life factor correlates for trajectory membership:** Descriptive analyses were conducted for  
204 the individual and family level early life factors disaggregated by sex. Once each of the children  
205 were assigned to trajectory groups to which each had maximum probability of group membership, a  
206 two steps process was used to identify early life factors associated with childhood trajectories of  
207 physical and sexual violence victimization. First, the independent association of each correlate to

208 trajectory group membership was assessed using univariable logistic regression analysis. Odds ratios,  
209 95% confidence intervals and p-values were reported. P-values <0.05 were considered statistically  
210 significant. Secondly, the selection of exposure variables for the multivariable model was based on  
211 documented evidence from existing literature of the associations between each of the correlates and  
212 violence victimization. Individual level factors were first added into the model, followed by family  
213 level factors. All correlates supported by literature and those with sufficient data were included in the  
214 final multivariable logistic regression model. Adjusted odds ratios (aOR), confidence intervals and p-  
215 values were reported following the multivariable analyses, with p-values <0.05 regarded as  
216 statistically significant. Post regression analyses conducted included a test for collinearity to assess if  
217 the explanatory variables in the model were inter-related. In addition, the Hosmer -Lemeshow  
218 goodness of fit test was conducted to test the final model fitness.

## 219 **Ethical considerations**

220 Ethical approval for the primary Bt20+ study was obtained from the Human Ethics and Research  
221 Committee (HREC-Medical) of the University of Witwatersrand prior to the start of the study  
222 (certificate number M111182). Written informed consent was initially obtained from the primary  
223 caregivers of the participants and at the appropriate age both children and the caregivers then  
224 provided written informed consent. For this secondary data analyses, permission to use the data was  
225 granted by Development Pathways for Health Research Unit (DPHRU) responsible for the primary  
226 study and a memorandum of agreement signed. Ethical clearance for the current study was granted  
227 by HREC-Medical at the University of Witwatersrand (certificate number M230218). Confidentiality  
228 of data was maintained throughout the research period by use of anonymized data which was  
229 password protected and backed up for safety.

## 230 **Results**

### 231 **Study characteristics**

232 A total of 3,273 children were enrolled at birth, of these 2,057(62.9%) and 2,051(62.7%) children  
233 had data on physical & sexual violence victimization in at least 2 of the 4 time points of data  
234 collection, respectively. Experience of physical violence ranged from 14.0% at age 5, with a peak of  
235 71.8% at age 15, that declined to 38.6% at 18 years of age. Sexual violence experiences ranged from  
236 0.8% at 5 years to a peak of 28.9% at the age of 18 years (Supplementary table 1). For both physical  
237 and sexual violence victimization, there were no significant differences between included and  
238 excluded samples with reference to sex, maternal age at birth, father's presence and birth weight.  
239 Compared to children excluded in this study, a greater proportion of children included in the study  
240 resided in households with middle-level socioeconomic status, lived in single parent households,  
241 with the Bt20+ child being an only child. In contrast, the included sample had a lower proportion of  
242 parents (both mothers and fathers) with post-school training compared to children in the excluded  
243 sample (Supplementary table 2 & 3). Covariates for physical and sexual violence victimization  
244 trajectories that were significantly different between included and excluded samples, were adjusted  
245 for in the multivariable analyses.

246 Similar proportions of children stratified by gender were reported among children included in the  
247 physical violence victimization and sexual violence victimization trajectory analyses (Table 1).  
248 Among the 2057 children included in the physical violence and 2051 children included in the sexual  
249 violence victimization trajectory analyses, there was a higher proportion of girls (52.5% physical  
250 violence; 52.4% sexual violence) than boys. More girls (12.7%) than boys (9.7%) were born with  
251 low birth weight. In both analyses, there was a decline in infant weight and height during infancy (0-  
252 2 years) for both girls and boys. During early childhood (2-5 years), a slight increase in weight was

253 observed among boys, with no reported change in height for both boys and girls. Overall, a higher  
254 proportion of children were born in households with low socioeconomic status (65.0% physical  
255 violence; 64.8% sexual violence) and less than half of the children resided in crowded households  
256 (41.8% physical violence; 42.0% sexual violence). In both analyses, only 10.4% of the children  
257 were born to a mother above the age of 35 years, a higher proportion of these children had siblings  
258 (61.9% physical violence; 61.8% sexual violence) and approximately 62.0% were living in single  
259 parent households at birth. A higher proportion of fathers (18.8% physical violence; 18.7% sexual  
260 violence) than mothers (8.6%) had attained higher schooling after completion of secondary school  
261 and only 15.2% of the children indicated that the father was at home. For both analyses, less than a  
262 fifth of the mother's indicated having previously experienced violence (18.4%) and most children  
263 were born through normal vaginal delivery (88.2%).

264 Table 1. Description of study sample characteristics stratified by sex

| Variables                                   | Physical violence victimization |              |              | Sexual violence victimization |              |              |
|---------------------------------------------|---------------------------------|--------------|--------------|-------------------------------|--------------|--------------|
|                                             | Total N (%)                     | Female n (%) | Male n (%)   | Total N (%)                   | Female n (%) | Male n (%)   |
| Total sample                                | 2057                            | 1080 (52.5)  | 977 (47.5)   | 2051                          | 1074 (52.4)  | 977 (47.6)   |
| <b>Outcome variables</b>                    |                                 |              |              |                               |              |              |
| <b>Violence trajectories</b>                |                                 |              |              |                               |              |              |
| Adolescent limited                          | 1340 (65.1)                     | 770 (71.3)   | 570 (53.8)   | 1519 (74.6)                   | 801 (74.6)   | 718 (73.5)   |
| Increasing (chronic /late)                  | 717 (34.9)                      | 310 (28.7)   | 407 (41.7)   | 532 (25.9)                    | 273 (25.4)   | 259 (26.5)   |
| <b>Exposure variables</b>                   |                                 |              |              |                               |              |              |
| <b>Individual level factors</b>             |                                 |              |              |                               |              |              |
| <b>Birth weight</b>                         |                                 |              |              |                               |              |              |
| Low birth weight (<2500 grams)              | 231 (11.3)                      | 137 (12.7)   | 94 (9.7)     | 230 (11.2)                    | 136 (12.7)   | 94 (9.7)     |
| Normal birth weight (≥ 2500 grams)          | 1822 (88.8)                     | 942 (87.3)   | 880 (90.4)   | 1817 (88.8)                   | 937 (87.3)   | 880 (90.4)   |
| <b>Infant and child growth</b>              |                                 |              |              |                               |              |              |
| Relative weight gain 0-2 years <sup>a</sup> | 1401                            | -0.01 (1.00) | -0.05 (1.00) | 1398                          | -0.01 (1.00) | -0.05 (0.99) |
| Relative weight gain 2-5 years <sup>a</sup> | 1292                            | -0.03 (1.03) | 0.02 (1.03)  | 1291                          | -0.03 (1.03) | 0.02 (1.03)  |
| Relative height gain 0-2 years <sup>a</sup> | 1402                            | -0.03 (0.99) | -0.06 (0.98) | 1399                          | -0.03 (0.99) | -0.06 (0.98) |
| Relative height gain 2-5 years <sup>a</sup> | 1292                            | 0.00 (0.97)  | 0.00 (1.03)  | 1291                          | 0.00 (0.97)  | 0.00 (1.03)  |
| <b>Family level factors</b>                 |                                 |              |              |                               |              |              |
| <b>Household socioeconomic status</b>       |                                 |              |              |                               |              |              |
| Low                                         | 1217 (65.0)                     | 630 (64.3)   | 587 (65.8)   | 1212 (64.8)                   | 626 (64.1)   | 586 (65.6)   |
| Middle                                      | 392 (20.9)                      | 200 (20.4)   | 192 (21.5)   | 392 (21.0)                    | 199 (20.4)   | 193 (21.6)   |
| High                                        | 263 (14.1)                      | 150 (15.3)   | 113 (12.7)   | 266 (14.2)                    | 152 (15.6)   | 114 (12.8)   |
| <b>Household crowding</b>                   |                                 |              |              |                               |              |              |
| Yes                                         | 744 (41.8)                      | 378 (40.3)   | 366 (43.5)   | 745 (42.0)                    | 376 (40.3)   | 369 (43.8)   |
| No                                          | 1034 (58.2)                     | 559 (59.7)   | 475 (56.5)   | 1030 (58.0)                   | 556 (59.7)   | 474 (56.2)   |
| <b>Maternal age at the time of birth</b>    |                                 |              |              |                               |              |              |
| ≤ 24 years                                  | 962 (46.8)                      | 504 (46.8)   | 458 (46.9)   | 961 (46.9)                    | 502 (46.8)   | 459 (47.0)   |
| 25–34 years                                 | 879 (42.8)                      | 466 (43.2)   | 413 (42.3)   | 875 (42.7)                    | 463 (43.2)   | 412 (42.2)   |

| Variables                                 | Physical violence victimization |              |            | Sexual violence victimization |              |            |
|-------------------------------------------|---------------------------------|--------------|------------|-------------------------------|--------------|------------|
|                                           | Total N (%)                     | Female n (%) | Male n (%) | Total N (%)                   | Female n (%) | Male n (%) |
| ≥ 35 years                                | 214 (10.4)                      | 108 (10.0)   | 106 (10.9) | 213 (10.4)                    | 107 (10.0)   | 106 (10.9) |
| <b>Maternal parity</b>                    |                                 |              |            |                               |              |            |
| 1 child                                   | 783 (38.1)                      | 423 (39.2)   | 360 (36.9) | 784 (38.2)                    | 423 (39.4)   | 361 (37.0) |
| >1 child                                  | 1274 (61.9)                     | 657 (60.8)   | 617 (63.2) | 1267 (61.8)                   | 651 (60.6)   | 616 (63.1) |
| <b>Marital status</b>                     |                                 |              |            |                               |              |            |
| Married                                   | 773 (37.8)                      | 394 (36.7)   | 379 (39.1) | 773 (37.9)                    | 392 (36.7)   | 381 (39.2) |
| Single                                    | 1270 (62.2)                     | 679 (63.3)   | 591 (60.9) | 1266 (62.1)                   | 676 (63.3)   | 590 (60.8) |
| <b>Maternal education status</b>          |                                 |              |            |                               |              |            |
| Primary & below                           | 232 (12.3)                      | 124 (12.5)   | 108 (12.1) | 233 (12.4)                    | 125 (12.6)   | 108 (12.1) |
| Secondary                                 | 1491 (79.1)                     | 786 (79.3)   | 705 (78.9) | 1490 (79.1)                   | 785 (79.4)   | 705 (78.8) |
| Post school training                      | 162 (8.6)                       | 81 (8.2)     | 81 (9.1)   | 161 (8.6)                     | 79 (8.0)     | 82 (9.2)   |
| <b>Paternal education status</b>          |                                 |              |            |                               |              |            |
| Primary & below                           | 121 (8.3)                       | 67 (8.8)     | 54 (7.8)   | 120 (8.3)                     | 66 (8.7)     | 54 (7.8)   |
| Secondary                                 | 1061 (72.9)                     | 543 (71.4)   | 518 (74.6) | 1060 (73.0)                   | 542 (71.6)   | 518 (74.5) |
| Post-school training                      | 273 (18.8)                      | 151 (19.8)   | 122 (17.6) | 272 (18.7)                    | 149 (19.7)   | 123 (17.7) |
| <b>Father present</b>                     |                                 |              |            |                               |              |            |
| Yes                                       | 1568 (84.9)                     | 825 (85.0)   | 743 (84.7) | 1564 (84.8)                   | 822 (84.9)   | 742 (84.7) |
| No                                        | 280 (15.2)                      | 146 (15.0)   | 134 (15.3) | 280 (15.2)                    | 146 (15.1)   | 134 (15.3) |
| <b>Maternal prior violence experience</b> |                                 |              |            |                               |              |            |
| Yes                                       | 184 (18.4)                      | 91 (17.3)    | 93 (19.5)  | 185 (18.4)                    | 92 (17.5)    | 93 (19.5)  |
| No                                        | 818 (81.6)                      | 435 (82.7)   | 383 (80.5) | 819 (81.6)                    | 434 (82.5)   | 385 (80.5) |
| <b>Mode of delivery</b>                   |                                 |              |            |                               |              |            |
| Vaginal delivery                          | 1012 (88.2)                     | 525 (88.8)   | 487 (87.6) | 1006 (88.2)                   | 521 (88.8)   | 485 (87.6) |
| Assisted delivery                         | 135 (11.8)                      | 66 (11.2)    | 69 (12.4)  | 135 (11.8)                    | 66 (11.2)    | 69 (12.5)  |

266 <sup>a</sup> Values are means (standard deviation)

## 267 **Trajectories of physical & sexual violence victimization**

268 After the examination of different trajectory group numbers and polynomial functions, a two-group  
269 model provided the most parsimonious model that best described patterns for both physical & sexual  
270 violence victimization between 5 and 18 years of age. However, the shape or patterns of violence  
271 victimization differed between physical and sexual violence victimization trajectories.

272 The two group trajectories of physical violence victimization had an early onset of violence  
273 victimization. These groups were (a) adolescent limited (65.1%) characterized by gradual increase in  
274 violence victimization from age 5 to 15 years, after which there was a decrease in violence  
275 victimization beginning at age 15, (b) the chronic increasing group (34.9%) was characterized by a  
276 persistently increasing pattern of violence victimization at all time points (Fig 1). The two-group  
277 model selected had the lowest BIC value, with average posterior probabilities for group membership  
278 greater than 0.70 for the adolescent limited group (0.93) and the chronic increasing group (0.73).  
279 This model had medium entropy of 0.56 reported (Supplementary table 4).

280

281 **Fig 1. Physical violence victimization trajectories among children between 5 and 18 years of**  
282 **age.**

283 Figure 1 legend; Note; lines show estimated trajectories, points at each age represent the observed  
284 proportion of children between the age of 5 to 18 years reporting physical violence victimization  
285 according to the assigned physical violence trajectory group.

286 Figure 2 below shows the two-group trajectories of sexual violence victimization that were  
287 characterized by a late onset of sexual violence victimization. These groups were the (a) adolescent  
288 limited (74.1%) and (b) late increasing (25.9%) trajectory groups of sexual violence victimization.  
289 The adolescent limited group was characterized by low sexual violence victimization at the age of 5  
290 years, whose onset was at age 11 with a peak at age 15. This was followed by a decrease in

291 experience of sexual violence from age 15. Onset for the late increasing trajectory group was also at  
292 age 11, followed by a persistent increase in sexual violence victimization at the age of 15 continuing  
293 to 18 years. The model with a quadratic (2) and cubic (3) term provided the best description of  
294 sexual violence victimization trajectories. Although the 2-group model with quadratic terms had a  
295 slightly lower BIC compared to the model selected, the significantly lower entropy (0.44) for this  
296 model made it less desirable for describing sexual violence victimization patterns. The final model  
297 selected had average posterior probabilities of 0.85 and 1.00 for the adolescent limited and late  
298 increasing group, respectively, with an entropy of 0.57 (Supplementary table 4).

299

300 **Fig 2. Sexual violence victimization trajectories among children between 5 and 18 years of age.**

301 Figure 2 legend; Note; lines show estimated trajectories, points at each age represent the observed  
302 proportion of children between the age of 5 to 18 years reporting sexual violence victimization  
303 according to the assigned sexual violence trajectory group.

### 304 **Early life factors associated with physical & sexual violence** 305 **victimization trajectories**

306 Table 2 and 3 show results of the independent and adjusted associations between the early life factors  
307 and physical and sexual violence victimization trajectory group membership, respectively. For  
308 physical violence victimization trajectories, individual and family level factors were significantly  
309 associated with trajectory group membership, both independently and after adjusting for other  
310 variables in the multivariable model. However, only family level factors significantly predicted  
311 sexual violence victimization trajectory group membership in the univariable, but not in the  
312 multivariable regression analyses.



313 Of the individual level factors, sex, relative infant weight gain and childhood height gain were  
314 independently associated with membership in the chronic increasing physical violence victimization  
315 trajectory group (table 2). From the univariable analysis, an increase in infant weight was associated  
316 with 14% greater odds of membership in the chronic increasing trajectory group (OR 1.14, 95% CI  
317 1.02; 1.27). The results show that height gain during childhood was protective against membership in  
318 the chronic increasing trajectory group. An increase in relative height was associated with 22% lower  
319 odds of membership in the chronic increasing trajectory group (OR 0.88, 95% CI 0.79; 0.99).  
320 Relative growth variables during infancy and childhood could not be included in the multivariable  
321 model due to the high proportion of missing data. After adjusting for other variables in the  
322 multivariable model, sex was the only individual level factor that was significantly associated with  
323 membership in the chronic increasing trajectory group. Boys had 67% higher odds of membership in  
324 the chronic increasing trajectory group compared to girls (aOR 1.67, 95% CI 1.31; 2.10).

325 Household socioeconomic status was the only family level factor significantly associated with  
326 membership in the chronic increasing physical violence victimization trajectory group, in the  
327 unadjusted analysis. In addition, maternal education ( $p=0.061$ ), household crowding ( $p=0.079$ ) and  
328 mode of delivery ( $p=0.082$ ) were marginally associated with chronic increasing trajectory group  
329 membership prior to adjusting for other factors. From the multivariable model, lower household  
330 socioeconomic status and lower maternal education were the only family level early life factors that  
331 predicted membership in the chronic increasing trajectory group, after adjusting for other variables in  
332 the model. Children from households within the middle socioeconomic status level had 32% lower  
333 odds of membership in the chronic increasing trajectory group compared to children residing in the  
334 low household socioeconomic status level (aOR 0.68, 95% CI 0.50; 0.92). Furthermore, children  
335 whose mothers had received at least some secondary education had 73% greater odds of chronic

336 increasing trajectory group membership compared to mothers with post-school training (aOR 1.73,  
 337 95% CI 1.08; 2.76). Mother’s prior experience of violence and mode of delivery were not included in  
 338 the multivariable analysis because of the high proportion of missing data for these two variables.

339 Table 2. Univariable and multivariable logistic regression model showing early life factors  
 340 associated with physical violence victimization trajectory group membership

| Variables                             | OR (95% CI)       | P-values | aOR (95% CI)      | P-values |
|---------------------------------------|-------------------|----------|-------------------|----------|
| <b>Individual level factors</b>       |                   |          |                   |          |
| <b>Sex</b>                            |                   | <0.001   |                   | <0.001   |
| Female (ref)                          | 1.00              |          | 1.00              |          |
| Male                                  | 1.77 (1.48; 2.13) |          | 1.67 (1.31; 2.10) |          |
| <b>Birth weight</b>                   |                   | 0.416    |                   | 0.479    |
| Normal (ref)                          | 1                 |          | 1                 |          |
| Low birth-weight                      | 1.12 (0.85; 1.49) |          | 1.15 (0.78; 1.68) |          |
| <b>Infants and child growth</b>       |                   |          |                   |          |
| Relative weight gain 0-2 years        | 1.14 (1.02; 1.27) | 0.023    |                   |          |
| Relative weight gain 2-5 years        | 0.98 (0.87; 1.09) | 0.664    |                   |          |
| Relative height gain 0-2 years        | 0.96 (0.86; 1.07) | 0.486    |                   |          |
| Relative height gain 2-5 years        | 0.88 (0.79; 0.99) | 0.035    |                   |          |
| <b>Family level factors</b>           |                   |          |                   |          |
| <b>Household socioeconomic status</b> |                   | 0.006    |                   | 0.034    |
| Low (ref)                             | 1.00              |          | 1.00              |          |
| Middle                                | 0.71 (0.55; 0.90) |          | 0.68 (0.50; 0.92) |          |
| High                                  | 0.73 (0.55; 0.98) |          | 0.77 (0.54; 1.11) |          |
| <b>Household crowding</b>             |                   | 0.079    |                   | 0.909    |
| Yes (ref)                             | 1.00              |          | 1.00              |          |
| No                                    | 0.84 (0.69; 1.02) |          | 0.99 (0.77; 1.26) |          |
| <b>Maternal age</b>                   |                   |          |                   |          |
| ≤ 24 years (ref)                      | 1.00              | 0.975    | 1.00              | 0.465    |
| 25 – 34 years                         | 0.99 (0.82; 1.20) |          | 1.18 (0.87; 1.60) |          |
| ≥ 35 years                            | 1.03 (0.75; 1.40) |          | 1.29 (0.80; 2.08) |          |
| <b>Parity</b>                         |                   | 0.395    |                   | 0.601    |
| One child (ref)                       | 1.00              |          | 1.00              |          |
| more than one child                   | 1.08 (0.90; 1.31) |          | 0.92 (0.68; 1.25) |          |
| <b>Marital Status</b>                 |                   | 0.096    |                   | 0.238    |
| Married (ref)                         | 1.00              |          | 1.00              |          |
| Single                                | 1.17 (0.97; 1.42) |          | 1.18 (0.89; 1.57) |          |

341

| <b>Variables</b>                          | <b>OR (95% CI)</b> | <b>P-values</b> | <b>aOR (95% CI)</b> | <b>P-values</b> |
|-------------------------------------------|--------------------|-----------------|---------------------|-----------------|
| <b>Maternal education status</b>          |                    | 0.061           |                     | 0.041           |
| Primary & below                           | 1.63 (1.05; 2.53)  |                 | 1.34 (0.74; 2.43)   |                 |
| Secondary                                 | 1.52 (1.06; 2.19)  |                 | 1.73 (1.08; 2.76)   |                 |
| Post-school training (ref)                | 1.00               |                 | 1.00                |                 |
| <b>Paternal education status</b>          |                    | 0.192           |                     | 0.869           |
| Primary & below                           | 1.26 (0.80; 1.99)  |                 | 1.15 (0.66; 1.98)   |                 |
| Secondary                                 | 1.31 (0.98; 1.74)  |                 | 1.08 (0.77; 1.51)   |                 |
| Post-school training (ref)                | 1.00               |                 | 1.00                |                 |
| <b>Father present</b>                     |                    | 0.473           |                     | 0.624           |
| Yes (ref)                                 | 1.00               |                 | 1.00                |                 |
| No                                        | 1.10 (0.85; 1.43)  |                 | 1.10 (0.76; 1.59)   |                 |
| <b>Maternal prior violence experience</b> |                    | 0.816           |                     |                 |
| Yes (ref)                                 | 1.00               |                 |                     |                 |
| No                                        | 1.04 (0.74; 1.46)  |                 |                     |                 |
| <b>Mode of delivery</b>                   |                    | 0.082           |                     |                 |
| Vaginal (ref)                             | 1.00               |                 |                     |                 |
| Assisted                                  | 0.70 (0.48; 1.04)  |                 |                     |                 |

342 OR: odds Ratio. aOR: adjusted Odds Ratio. Ref: reference group. Adolescent limited violence  
 343 trajectory group acts as the outcome reference group. Goodness of fit of the model;  $p=0.262$

344 Results from table 3 demonstrate that only family level factors significantly predicted membership in  
 345 the late increasing sexual violence victimization trajectory group, in the univariable regression  
 346 analyses ( $p<0.05$ ). Children from households with high socioeconomic status and no crowding had  
 347 42% (OR 0.58, 95% CI 0.41; 0.81) and 26% (OR 0.74, 95% CI 0.60; 0.92) lower odds of  
 348 membership in the late increasing trajectory group compared to children from lower socioeconomic  
 349 households and children from crowded households, respectively. Independently, the odds of  
 350 membership in the late increasing trajectory group were greater with decreasing maternal (primary &  
 351 below OR 2.56, 95% CI 1.55; 4.23, secondary OR 1.83, 95% CI 1.18; 2.83) and paternal (primary &  
 352 below OR 1.70 95% CI 1.02; 2.83, secondary OR 1.60, 95% CI 1.19; 2.34) education compared to  
 353 children from parents with post-school training. None of these factors remained statistically  
 354 significant after adjusting for all other variables in the multivariable model. However, household

355 socioeconomic status showed marginally significant ( $p=0.07$ ) association with membership in the  
 356 late increasing trajectory group in the multivariable analyses. Children residing in high  
 357 socioeconomic households had 37% lower odds of membership in the late increasing trajectory  
 358 group compared to children residing in households with low socioeconomic status (aOR 0.63, 95%  
 359 CI 0.42; 0.95), after adjusting for covariates in the model. Due to the high proportion of missing data  
 360 for growth variables, maternal prior violence experience and mode of delivery, these variables could  
 361 not be included in the multivariable model.

362 Table 3. Univariable and multivariable logistic regression model showing early life factors  
 363 associated with sexual violence victimization trajectory group membership

| Variables                             | OR (95% CI)       | P-values | aOR (95% CI)      | P-values |
|---------------------------------------|-------------------|----------|-------------------|----------|
| <b>Individual level factors</b>       |                   |          |                   |          |
| <b>Sex</b>                            |                   | 0.574    |                   | 0.519    |
| Female (ref)                          | 1.00              |          | 1.00              |          |
| Male                                  | 1.06 (0.87; 1.29) |          | 0.92 (0.71; 1.19) |          |
| <b>Birthweight</b>                    |                   | 0.312    |                   | 0.848    |
| Normal (ref)                          | 1.00              |          | 1.00              |          |
| Low birth-weight                      | 1.17 (0.86; 1.59) |          | 1.04 (0.69; 1.57) |          |
| <b>Infant and child growth</b>        |                   |          |                   |          |
| Relative weight gain 0-2 years        | 1.02 (0.90; 1.15) | 0.736    |                   |          |
| Relative weight gain 2-5 years        | 0.99 (0.88; 1.12) | 0.915    |                   |          |
| Relative height gain 0-2 years        | 0.95 (0.84; 1.07) | 0.393    |                   |          |
| Relative height gain 2-5 years        | 0.91 (0.80; 1.03) | 0.128    |                   |          |
| <b>Family level factors</b>           |                   |          |                   |          |
| <b>Household socioeconomic status</b> |                   | <0.003   |                   | 0.0671   |
| Low (ref)                             | 1.00              |          | 1.00              |          |
| Middle                                | 0.81 (0.62; 1.05) |          | 0.82 (0.59; 1.13) |          |
| High                                  | 0.58 (0.41; 0.81) |          | 0.63 (0.42; 0.95) |          |
| <b>Household crowding</b>             |                   | 0.007    |                   | 0.300    |
| Yes (ref)                             | 1.00              |          | 1.00              |          |
| No                                    | 0.74 (0.60; 0.92) |          | 0.87 (0.66; 1.13) |          |
| <b>Maternal age</b>                   |                   | 0.248    |                   | 0.862    |
| ≤ 24 years (ref)                      | 1.00              |          | 1.00              |          |
| 25 – 34 years                         | 0.91 (0.74; 1.13) |          | 0.93 (0.67; 1.29) |          |
| ≥ 35 years                            | 1.20 (0.87; 1.67) |          | 1.02 (0.61; 1.72) |          |

| <b>Variables</b>                          | <b>OR (95% CI)</b> | <b>P-values</b> | <b>aOR (95% CI)</b> | <b>P-values</b> |
|-------------------------------------------|--------------------|-----------------|---------------------|-----------------|
| <b>Parity</b>                             |                    | 0.332           |                     | 0.721           |
| One child (ref)                           | 1.00               |                 | 1.00                |                 |
| more than one child                       | 1.11 (0.90; 1.36)  |                 | 1.06 (0.76; 1.47)   |                 |
| <b>Marital Status</b>                     |                    | 0.761           |                     | 0.768           |
| Married (ref)                             | 1.00               |                 | 1.00                |                 |
| Single                                    | 1.03 (0.84; 1.27)  |                 | 1.05 (0.77; 1.42)   |                 |
| <b>Maternal education status</b>          |                    | 0.001           |                     | 0.327           |
| Primary & below                           | 2.56 (1.55; 4.23)  |                 | 1.63 (0.85; 3.13)   |                 |
| Secondary                                 | 1.83 (1.18; 2.83)  |                 | 1.31 (0.77; 2.23)   |                 |
| Post-school training (ref)                | 1.00               |                 | 1.00                |                 |
| <b>Paternal education status</b>          |                    | 0.012           |                     | 0.337           |
| Primary & below                           | 1.70 (1.02; 2.83)  |                 | 1.13 (0.62; 2.06)   |                 |
| Secondary                                 | 1.67 (1.19; 2.34)  |                 | 1.32 (0.89; 1.94)   |                 |
| Post-school training (ref)                | 1.00               |                 | 1.00                |                 |
| <b>Father present</b>                     |                    | 0.741           |                     | 0.225           |
| Yes (ref)                                 | 1.00               |                 | 1.00                |                 |
| No                                        | 0.95 (0.71; 1.27)  |                 | 0.77 (0.50; 1.18)   |                 |
| <b>Maternal prior violence experience</b> |                    | 0.432           |                     |                 |
| Yes (ref)                                 | 1.00               |                 |                     |                 |
| No                                        | 1.17 (0.80; 1.71)  |                 |                     |                 |
| <b>Mode of delivery</b>                   |                    | 0.482           |                     |                 |
| Vaginal (ref)                             | 1.00               |                 |                     |                 |
| Assisted                                  | 0.86 (0.56; 1.31)  |                 |                     |                 |

364 OR: Odds Ratio. aOR: adjusted Odds Ratio. Ref: reference group. Adolescent limited violence  
365 trajectory group acts as the outcome reference group. Goodness of fit of the model;  $p=0.520$   
366 Results for the post regression goodness of fit analysis conducted after selection of final models for  
367 both physical ( $p=0.262$ ) and sexual ( $p=0.520$ ) violence victimization trajectories, did not provide  
368 evidence of a lack of model fitness. Low variance inflation factor (VIF) scores for both physical  
369 (mean VIF 1.2) and sexual (mean VIF 1.18) violence victimization from the multivariable analyses  
370 indicate that there was no multicollinearity among covariates included in each of the multivariable  
371 models.

## 372 **Discussion**

373 The present study sought to examine the number and shapes of physical and sexual violence  
374 victimization trajectories between the ages of 5 and 18 years, as well as identify factors in early life  
375 associated with trajectory group membership. The results from the group-based trajectory modelling  
376 identified two trajectories of physical and two trajectories of sexual violence victimization, for the  
377 best description of physical violence victimization and sexual violence victimization patterns  
378 between the ages of 5 and 18 years. Overall, both the individual level (sex) and family level  
379 (household socioeconomic status and maternal education) factors were identified as important  
380 determinants of physical violence victimization trajectory group membership. However,  
381 vulnerability to increasing sexual violence victimization was largely determined by the family level  
382 factors (household socioeconomic status).

383 These findings show that less than a fifth of all the children in the sample experienced physical  
384 violence during early childhood. However, cases of physical violence victimization increased with  
385 age, as children engage with more environments outside the home. By mid-adolescence (15 years),  
386 almost three quarters of all the children were victims of physical violence. Physical violence  
387 victimization then begins to decline at 18 years. These findings are consistent with previous literature  
388 indicating that physical violence victimization is concentrated during childhood and early adolescent  
389 years and decreases with increasing age after mid-adolescence [37–39].

390 In accordance with literature, the majority of the children in the present study exhibited an increasing  
391 pattern of physical violence victimization as they grew older, with incidences of physical violence  
392 victimization primarily occurring between early childhood and mid-adolescence. However, for a  
393 third of the children, their experience of physical violence did not decrease in mid-adolescence, and  
394 gradually increased as they reached adulthood. Evidence of the presence of an adolescent limited and

395 increasing physical violence trajectory group was reported by Semenza et al. [11], among individuals  
396 assessed across 4 data collection points between 12 and 34 years of age (wave 1 - 12-19 years, wave  
397 2-13-20 years, wave 3 - 18-26 years and wave 4 - 24-34 years). Similar to our findings, the  
398 adolescent limited trajectory group was characterized by elevated levels of violence victimization in  
399 early adolescence that decreased rapidly as respondents transitioned to adulthood. In contrast, the  
400 increasing physical violence trajectory group was characterized by low experience of physical  
401 violence in adolescence which increased into adulthood. Two other trajectory groups, little to no  
402 victimization and high decreasing trajectory groups were identified by these authors [11].

403 Our results show that parent - reported cases of sexual violence victimization were less than 1% for  
404 children at 5 years. In general, incidence of sexual violence steadily increased with age during  
405 adolescence, and by the age of 18, nearly 1 in 3 children in the sample experienced sexual violence.  
406 The few to no parent-reported cases of sexual violence in early childhood may be a result of under-  
407 reporting or lack of knowledge of their child's sexual experiences by parents or caregivers [40].  
408 Other studies have documented a higher likelihood of sexual violence victimization among  
409 adolescent and adult samples compared to younger child samples [38,41]. A study among South  
410 African children between the ages of 10 and 17 years reported that, almost a quarter of child abuse  
411 perpetrators were intimate partners, a reason that can account for higher sexual abuse cases as  
412 children grow older and engage in intimate partner relationships [38].

413 For three quarters of the children, low sexual violence experiences were reported at 11 years, with  
414 incidences of sexual violence decreasing from 15 years of age. In contrast, a quarter of the children  
415 experience of sexual violence increased exponentially as they approached adulthood. Similar to our  
416 results, Jones et al. [9] generated two trajectory groups of sexual violence victimization assessed  
417 between the ages of 2 to 12 years. The two groups were; (a) no sexual violence victimization (b) a

418 curvilinear pattern of sexual violence victimization characterized by low violence allegations at  
419 younger and older ages and a peak in sexual violence victimization between ages 4 to 8 years. The  
420 study recruited high risk children with data on alleged or substantiated allegations of child  
421 maltreatment or witnessing violence from child protective services records, a plausible reason for  
422 high sexual victimization experiences at younger ages [9].

423 Our findings show that individual level factors predicted membership in the chronic physical  
424 violence but not the late increasing sexual violence victimization trajectory group. For physical  
425 violence victimization, independent of other factors, boys were almost twice as likely as girls to be in  
426 the chronic increasing trajectory group. Similar findings have been demonstrated in other studies  
427 [2,11,37,42,43], and a possible reason for this is the fact that boys experience more conduct problems  
428 and exhibit greater externalizing behaviour compared to girls that places them at a heightened risk  
429 for both physical violence victimization and perpetration [18,44]. Although boys had a lower  
430 likelihood of membership in the late increasing sexual violence victimization group, this association  
431 was not significant. Contrary to this, many studies report significantly higher prevalence of sexual  
432 violence among girls than boys [38,41,45]. The lack of a significant difference in trajectory group  
433 membership between boys and girls may be explained by the use of self-completed questionnaires  
434 from the age of 11 years, that has been documented to contribute to higher disclosure on sexual  
435 violence experiences especially among boys [46].

436 From the univariable analyses increase in infant weight was a risk factor for chronic increasing  
437 physical violence trajectory group membership. In addition, being taller had a protective effect  
438 against membership in the persistently increasing physical violence victimization group. Rapid infant  
439 weight gain during infancy [24,28] and lower conditional height/ stunting during mid-childhood have  
440 been associated with overweight/ obesity in later childhood or adulthood [47,48], a risk factor for



441 bullying and teasing in childhood [29,30]. None of the infant and child growth factors were  
442 associated with late increase sexual violence victimization group membership. Richter et al. [49]  
443 found conflicting results with stunted boys having a higher likelihood of sexual violence experience  
444 compared to boys with normal height for their age. Child growth factors could not be assessed  
445 further in adjusted analyses due to limited responses for these variables. Similar to findings from  
446 Startbuck et al. [50], birthweight was not significantly associated with physical and sexual violence  
447 victimization.

448 Family level factors independently, and when adjusted for other confounding variables, predicted  
449 membership in the increasing trajectory group for both physical (household socioeconomic status  
450 and maternal education) and sexual violence (household socioeconomic status only) victimization.  
451 Adjusting for other factors, higher household socioeconomic status was associated with lower risk of  
452 membership in the chronic increasing physical violence victimization trajectory group. This  
453 corresponds with evidence from other studies showing that physical violence experiences are higher  
454 among poorer households [43,51]. Higher socioeconomic status appeared to be protective against  
455 inclusion in the late increasing sexual violence victimization group. However, this association was  
456 not significant after other factors were taken into account. Richter et al. [49] found similar findings,  
457 with household socioeconomic status being only significantly associated with sexual abuse among  
458 boys prior to adjusting for other covariates.

459 Maternal education seems to be protective against chronic physical violence victimization trajectory  
460 group membership. Further evidence of this was reported by Semenza et al [11], who found that  
461 higher parental education was associated with a lower probability of membership in the increasing  
462 physical violence victimization compared to no victimization trajectory group. However, in our study  
463 higher maternal rather than paternal education was negatively associated with chronic physical

464 violence victimization trajectory group membership. This could be explained by the study results by  
465 Sui et al. [13], which demonstrated that maternal presence in the household was associated with non-  
466 involvement in both violence victimization and perpetration.

467 From the independent analyses lower maternal and paternal education and household crowding were  
468 associated with a greater likelihood of membership in the late increasing sexual violence  
469 victimization trajectory group. This association, however, was not found to be significant after  
470 adjusting for other covariates in the model. Consistent with our findings, Ward et al. [46], found a  
471 marginal significant association in the univariable and not multivariable analyses between sharing a  
472 bedroom with more than one person and sexual abuse. Similar to our findings, marital status,  
473 maternal education and father's presence were not found to be significantly associated with sexual  
474 abuse among boys in South Africa [49].

475 Interpretation of study findings should take into consideration the following limitations. First,  
476 presence of large gaps between data collection points when data on physical or sexual violence  
477 victimization could not be captured separately, may have affected the ability to discern more  
478 heterogeneity in violence victimization trajectories. Additional time points with violence  
479 victimization data in future research will provide a better characterization of violence patterns during  
480 childhood. High proportion of missing data limited the inclusion of growth variables into the  
481 multivariable model. Further research on the effect of infant catch-up and early childhood growth on  
482 violence victimization should be explored. The population under study represents an urban  
483 population, with a majority black population, and therefore results of this study should not be  
484 generalizable to the South African population. Finally, use of caregiver reports and self-reporting on  
485 sensitive issues such as sexual violence victimization may be subject to under-reporting or introduce

486 social desirability bias. The large sample size and repeated collection of measures at different waves  
487 can reduce the magnitude of this bias.

488 Irrespective of the limitation mentioned above, several strengths of this study are worth mentioning.  
489 Studies identifying risk factors for violence victimization are based largely on cross-sectional or  
490 retrospective studies on lifetime childhood violence experiences. Results from these studies are  
491 subject to recall bias. This current study is based on a prospective study design with smaller recall  
492 period of 12 months limiting the magnitude of recall bias. In addition, the longitudinal nature of data  
493 collection allows for the characterization of violence victimization patterns. These violence patterns  
494 generated can further be assessed as predictors of later human capital outcomes in adulthood.  
495 Assessment of early life risk factors at the first years of life that predict violence trajectory group  
496 membership allow for the possibility of temporal association to be assessed.

497 In summary, this study demonstrates that children within the same environment or neighborhoods  
498 can follow different patterns of physical and sexual violence victimization from childhood to  
499 adolescence. The identification of early life factors associated with membership in these violence  
500 victimization groups, provides potential early target prevention areas that impede the risk of  
501 increasing violence victimization and also provides information on factors that can be encouraged to  
502 mitigate a child's exposure and experience of violence. This study only identified individual and  
503 family early life factors associated with violence experience. Both these factors are heavily  
504 influenced by the community factors and structures set up in the society. There is a need for future  
505 research to include community and societal exposure factors when assessing risk factors for violence  
506 victimization trajectories.

## 507 **Acknowledgements**

508 The authors would like to thank the Birth to Twenty-Plus participants for their role in providing data  
509 for this work and also appreciate DSI-NRF Centre of Excellence in Human Development for  
510 granting access to use the Birth to Twenty-Plus Cohort data. We are grateful to the University of  
511 Witwatersrand HREC for provision of ethical clearance.

## 512 **References**

- 513 1. Hillis S, Mercy J, Amobi A, Kress H. Global Prevalence of Past-year Violence Against  
514 Children: A Systematic Review and Minimum Estimates. *Pediatrics*. 2016;137: e20154079.  
515 doi:10.1542/peds.2015-4079
- 516 2. Moody G, Cannings-John R, Hood K, Kemp A, Robling M. Establishing the international  
517 prevalence of self-reported child maltreatment: a systematic review by maltreatment type and  
518 gender. *BMC Public Health*. 2018;18: 1164. doi:10.1186/s12889-018-6044-y
- 519 3. Burton P, Ward CL, Artz L, Leoschut L. The Optimus Study on Child Abuse, Violence and  
520 Neglect in South Africa (2015) | PDF | Child Neglect | Child Abuse. Available from:  
521 <https://www.scribd.com/document/314489410/First-ever-national-study-of-child-maltreatment>
- 522 4. World Health Organization. INSPIRE Technical Package. [cited 6 Mar 2023]. Available from:  
523 [https://www.who.int/teams/social-determinants-of-health/violence-prevention/inspire-technical-](https://www.who.int/teams/social-determinants-of-health/violence-prevention/inspire-technical-package)  
524 [package](https://www.who.int/teams/social-determinants-of-health/violence-prevention/inspire-technical-package)
- 525 5. United Nations Children’s Fund (UNICEF). A Familiar Face: Violence in the lives of children  
526 and adolescents. In: UNICEF DATA. 1 Nov 2017 [cited 13 Oct 2022]. Available from:  
527 <https://data.unicef.org/resources/a-familiar-face/>

- 528 6. United Nations Educational, Scientific and Cultural Organization (UNESCO). Behind the  
529 numbers: ending school violence and bullying - UNESCO Digital Library. [cited 2 Mar 2023].  
530 Available from: <https://unesdoc.unesco.org/ark:/48223/pf0000366483>
- 531 7. Richter LM, Mathews S, Kagura J, Nonterah E. A longitudinal perspective on violence in the  
532 lives of South African children from the Birth to Twenty Plus cohort study in Johannesburg-  
533 Soweto. *S Afr Med J*. 2018;108: 181. doi:10.7196/SAMJ.2018.v108i3.12661
- 534 8. Sumter SR, Baumgartner SE, Valkenburg PM, Peter J. Developmental Trajectories of Peer  
535 Victimization: Off-line and Online Experiences During Adolescence. *J Adolesc Health*.  
536 2012;50: 607–613. doi: 10.1016/j.jadohealth.2011.10.251
- 537 9. Jones DJ, Runyan DK, Lewis T, Litrownik AJ, Black MM, Wiley T, et al. Trajectories of  
538 childhood sexual abuse and early adolescent HIV/AIDS risk behaviors: the role of other  
539 maltreatment, witnessed violence, and child gender. *J Clin Child Adolesc Psychol Off J Soc*  
540 *Clin Child Adolesc Psychol Am Psychol Assoc Div 53*. 2010;39: 667–680.  
541 doi:10.1080/15374416.2010.501286
- 542 10. Pahl K, Williams SZ, Lee JY, Joseph A, Blau C. Trajectories of Violent Victimization  
543 Predicting PTSD and Comorbidities among Urban Ethnic/Racial Minorities. *J Consult Clin*  
544 *Psychol*. 2020;88: 39–47. doi:10.1037/ccp0000449
- 545 11. Semenza DC, Testa A, Turanovic JJ. Trajectories of violent victimization over the life course:  
546 Implications for mental and physical health. *Adv Life Course Res*. 2021;50: 100436. doi:  
547 10.1016/j.alcr.2021.100436

- 548 12. Tracy M, Salo M, Slopen N, Udo T, Appleton AA. Trajectories of childhood adversity and the  
549 risk of depression in young adulthood: Results from the Avon Longitudinal Study of Parents  
550 and Children. *Depress Anxiety*. 2019;36: 596–606. doi:10.1002/da.22887
- 551 13. Sui X, Massar K, Ruitter RAC, Reddy PS. Violence typologies and sociodemographic correlates  
552 in South African adolescents: a three-wave cross-sectional study. *BMC Public Health*. 2020;20:  
553 221. doi:10.1186/s12889-020-8332-6
- 554 14. Maldonado-Molina MM, Jennings WG, Tobler AL, Piquero AR, Canino G. Assessing the  
555 victim-offender overlap among Puerto Rican youth. *J Crim Justice*. 2010;38: 1191–1201.
- 556 15. Jennings WG, Piquero AR, Reingle JM. On the overlap between victimization and offending: A  
557 review of the literature. *Aggress Violent Behav*. 2012;17: 16–26. doi:  
558 10.1016/j.avb.2011.09.003
- 559 16. Miley LN, Fox B, Muniz CN, Perkins R, DeLisi M. Does childhood victimization predict  
560 specific adolescent offending? An analysis of generality versus specificity in the victim-  
561 offender overlap. *Child Abuse Negl*. 2020;101: 104328. doi: 10.1016/j.chiabu.2019.104328
- 562 17. Tremblay RE, Nagin DS, Séguin JR, Zoccolillo M, Zelazo PD, Boivin M, et al. Physical  
563 Aggression During Early Childhood: Trajectories and Predictors. *Pediatrics*. 2004;114: e43–  
564 e50. doi:10.1542/peds.114.1.e43
- 565 18. Gutman LM, Joshi H, Parsonage M, Schoon I. Gender-Specific Trajectories of Conduct  
566 Problems from Ages 3 to 11. *J Abnorm Child Psychol*. 2018;46: 1467–1480.  
567 doi:10.1007/s10802-017-0379-1

- 568 19. Nagin DS, Tremblay RE. Parental and Early Childhood Predictors of Persistent Physical  
569 Aggression in Boys from Kindergarten to High School. *Arch Gen Psychiatry*. 2001;58: 389–  
570 394. doi:10.1001/archpsyc.58.4.389
- 571 20. Gao Y, Mi X, Wang Y, Zou S, Zhou H. Association between Household Crowding and Violent  
572 Discipline and Neglect of Children: Analysis of Multiple Indicator Cluster Surveys in 26 Low-  
573 and Middle-Income Countries. *Int J Environ Res Public Health*. 2021;18: 1685.  
574 doi:10.3390/ijerph18041685
- 575 21. Palermo T, Pereira A, Neijhoft N, Bello G, Buluma R, Diem P, et al. Risk factors for childhood  
576 violence and polyvictimization: A cross-country analysis from three regions. *Child Abuse Negl*.  
577 2019;88: 348–361. doi: 10.1016/j.chiabu.2018.10.012
- 578 22. Stith SM, Liu T, Davies LC, Boykin EL, Alder MC, Harris JM, et al. Risk factors in child  
579 maltreatment: A meta-analytic review of the literature. *Aggress Violent Behav*. 2009;14: 13–29.  
580 doi: 10.1016/j.avb.2006.03.006
- 581 23. Hayati Rezvan P, Tomlinson M, Christodoulou J, Almirol E, Stewart J, Gordon S, et al.  
582 Intimate Partner Violence and Food Insecurity Predict Early Behavior Problems Among South  
583 African Children over 5-years post-birth. *Child Psychiatry Hum Dev*. 2021;52: 409–419.  
584 doi:10.1007/s10578-020-01025-1
- 585 24. Salgin B, Norris SA, Prentice P, Pettifor JohnM, Richter LM, Ong KK, et al. Even transient  
586 rapid infancy weight gain is associated with higher BMI in young adults and earlier menarche.  
587 *Int J Obes* 2005. 2015;39: 939–944. doi:10.1038/ijo.2015.25

- 588 25. Evensen E, Emaus N, Kokkvoll A, Wilsgaard T, Furberg A-S, Skeie G. The relation between  
589 birthweight, childhood body mass index, and overweight and obesity in late adolescence: a  
590 longitudinal cohort study from Norway, The Tromsø Study, Fit Futures. *BMJ Open*. 2017;7:  
591 e015576. doi:10.1136/bmjopen-2016-015576
- 592 26. Kapral N, Miller SE, Scharf RJ, Gurka MJ, DeBoer MD. Associations between birthweight and  
593 overweight and obesity in school-age children. *Pediatr Obes*. 2018;13: 333–341.  
594 doi:10.1111/ijpo.12227
- 595 27. Ong KK, Ahmed ML, Emmett PM, Preece MA, Dunger DB. Association between postnatal  
596 catch-up growth and obesity in childhood: prospective cohort study. *BMJ*. 2000;320: 967–971.  
597 doi:10.1136/bmj.320.7240.967
- 598 28. Zheng M, Lamb KE, Grimes C, Laws R, Bolton K, Ong KK, et al. Rapid weight gain during  
599 infancy and subsequent adiposity: a systematic review and meta-analysis of evidence. *Obes Rev*  
600 *Off J Int Assoc Study Obes*. 2018;19: 321–332. doi:10.1111/obr.12632
- 601 29. Van Geel M, Vedder P, Tanilon J. Are overweight and obese youths more often bullied by their  
602 peers? A meta-analysis on the relation between weight status and bullying. *Int J Obes*. 2014;38:  
603 1263–1267. doi:10.1038/ijo.2014.117
- 604 30. Haegele JA, Aigner C, Healy S. Impact of weight and disability status on bullying victimisation  
605 and perpetration among youth. *J Paediatr Child Health*. 2021;57: 383–387.  
606 doi:10.1111/jpc.15230



- 607 31. Janssen I, Craig WM, Boyce WF, Pickett W. Associations between overweight and obesity  
608 with bullying behaviors in school-aged children. *Pediatrics*. 2004;113: 1187–1194.  
609 doi:10.1542/peds.113.5.1187
- 610 32. Richter L, Norris S, Pettifor J, Yach D, Cameron N. Cohort Profile: Mandela’s children: The  
611 1990 birth to twenty study in South Africa. *Int J Epidemiol*. 2007;36: 504–511.  
612 doi:10.1093/ije/dym016
- 613 33. Norris SA, Richter LM, Fleetwood SA. Panel studies in developing countries: case analysis of  
614 sample attrition over the past 16 years within the birth to twenty cohort in Johannesburg, South  
615 Africa. *J Int Dev*. 2007;19: 1143–1150. doi:10.1002/jid.1390
- 616 34. Nagin DS, Odgers CL. Group-Based Trajectory Modeling in Clinical Research. *Annu Rev Clin*  
617 *Psychol*. 2010;6: 109–138. doi: 10.1146/annurev.clinpsy.121208.131413
- 618 35. Nagin DS. Group-Based Trajectory Modeling: An Overview. *Ann Nutr Metab*. 2014;65: 205–  
619 210. doi:10.1159/000360229
- 620 36. traj: group-based modeling of longitudinal data. [cited 7 Aug 2023]. Available from:  
621 <https://www.andrew.cmu.edu/user/bjones/>
- 622 37. Macmillan R. Violence and the Life Course: The Consequences of Victimization for Personal  
623 and Social Development. *Annu Rev Sociol*. 2001;27: 1–22. doi: 10.1146/annurev.soc.27.1.1
- 624 38. Meinck F, Cluver LD, Boyes ME, Loening-Voysey H. Physical, emotional and sexual  
625 adolescent abuse victimisation in South Africa: prevalence, incidence, perpetrators and  
626 locations. *J Epidemiol Community Health*. 2016;70: 910–916. doi:10.1136/jech-2015-205860

- 627 39. Aboagye RG, Seidu A-A, Adu C, Cadri A, Mireku DO, Ahinkorah BO. Interpersonal violence  
628 among in-school adolescents in sub-Saharan Africa: Assessing the prevalence and predictors  
629 from the Global School-based health survey. *SSM - Popul Health*. 2021;16: 100929.  
630 doi:10.1016/j.ssmph.2021.100929
- 631 40. Pfeiffer L, Salvagni EP. Current view of sexual abuse in childhood and adolescence. *J Pediatr*  
632 (Rio J). 2005;81: 197–204. doi:10.2223/JPED.1408
- 633 41. Stoltenborgh M, van Ijzendoorn MH, Euser EM, Bakermans-Kranenburg MJ. A global  
634 perspective on child sexual abuse: meta-analysis of prevalence around the world. *Child*  
635 *Maltreat*. 2011;16: 79–101. doi:10.1177/1077559511403920
- 636 42. United Nations Children’s Fund (UNICEF). Hidden in plain sight: A statistical analysis of  
637 violence against children. [cited 13 Oct 2022]. Available from:  
638 [https://www.unicef.org/documents/hidden-plain-sight-statistical-analysis-violence-against-](https://www.unicef.org/documents/hidden-plain-sight-statistical-analysis-violence-against-children)  
639 [children](https://www.unicef.org/documents/hidden-plain-sight-statistical-analysis-violence-against-children)
- 640 43. Mahlangu P, Chirwa E, Machisa M, Sikweyiya Y, Shai N, Jewkes R. Prevalence and factors  
641 associated with experience of corporal punishment in public schools in South Africa. *PLOS*  
642 *ONE*. 2021;16: e0254503. doi: 10.1371/journal.pone.0254503
- 643 44. Richter LM, Ahun MN, Besharati S, Naicker SN, Orri M. Adolescent Mental Health Problems  
644 and Adult Human Capital: Findings from the South African Birth to Twenty Plus Cohort at  
645 28 Years of Age. *J Adolesc Health*. 2021;69: 782–789. doi: 10.1016/j.jadohealth.2021.04.017
- 646 45. Cerna-Turoff I, Fang Z, Meierkord A, Wu Z, Yanguela J, Bangirana CA, et al. Factors  
647 Associated with violence against children in Low- and Middle-Income Countries: A Systematic

- 648 Review and Meta-Regression of Nationally Representative Data. *Trauma Violence Abuse*.  
649 2021;22: 219–232. doi:10.1177/1524838020985532
- 650 46. Ward CL, Artz L, Leoschut L, Kassanje R, Burton P. Sexual violence against children in  
651 South Africa: a nationally representative cross-sectional study of prevalence and correlates.  
652 *Lancet Glob Health*. 2018;6: e460–e468. doi:10.1016/S2214-109X(18)30060-3
- 653 47. Bove I, Miranda T, Campoy C, Uauy R, Napol M. Stunting, overweight and child development  
654 impairment go hand in hand as key problems of early infancy: Uruguayan case. *Early Hum*  
655 *Dev*. 2012;88: 747–751. doi: 10.1016/j.earlhumdev.2012.04.002
- 656 48. Adair LS, Fall CHD, Osmond C, Stein AD, Martorell R, Ramirez-Zea M, et al. Associations of  
657 linear growth and relative weight gain during early life with adult health and human capital in  
658 countries of low and middle income: findings from five birth cohort studies. *Lancet Lond Engl*.  
659 2013;382: 525–534. doi:10.1016/S0140-6736(13)60103-8
- 660 49. Richter LM, Mathews S, Nonterah E, Masilela L. A longitudinal perspective on boys as victims  
661 of childhood sexual abuse in South Africa: Consequences for adult mental health. *Child Abuse*  
662 *Negl*. 2018;84: 1–10. doi: 10.1016/j.chiabu.2018.07.016
- 663 50. Starbuck GW, Krantzler N, Forbes K, Barnes V. Child abuse and neglect on Oahu, Hawaii:  
664 description and analysis of four purported risk factors. *J Dev Behav Pediatr*. 1984;5: 55–59.
- 665 51. Meinck F, Cluver LD, Boyes ME, Ndhlovu LD. Risk and Protective Factors for Physical and  
666 Emotional Abuse Victimization amongst Vulnerable Children in South Africa: Physical and  
667 Emotional Child Abuse in South Africa. *Child Abuse Rev*. 2015;24: 182–197.  
668 doi:10.1002/car.2283

## **Supporting information**

**S1 Supplementary table 1. Proportions of physical and sexual violence victimization per age.**

**S2 Supplementary table 2. Characteristics of excluded and included sample for physical violence victimization trajectory analyses.**

**S3 Supplementary table 3. Characteristics of included and excluded sample for sexual violence victimization trajectory analyses.**

**Supplementary table 4. Physical and sexual violence victimization trajectory model selection and adequacy.**

**S5 Supplementary text. Sample Power calculation.**

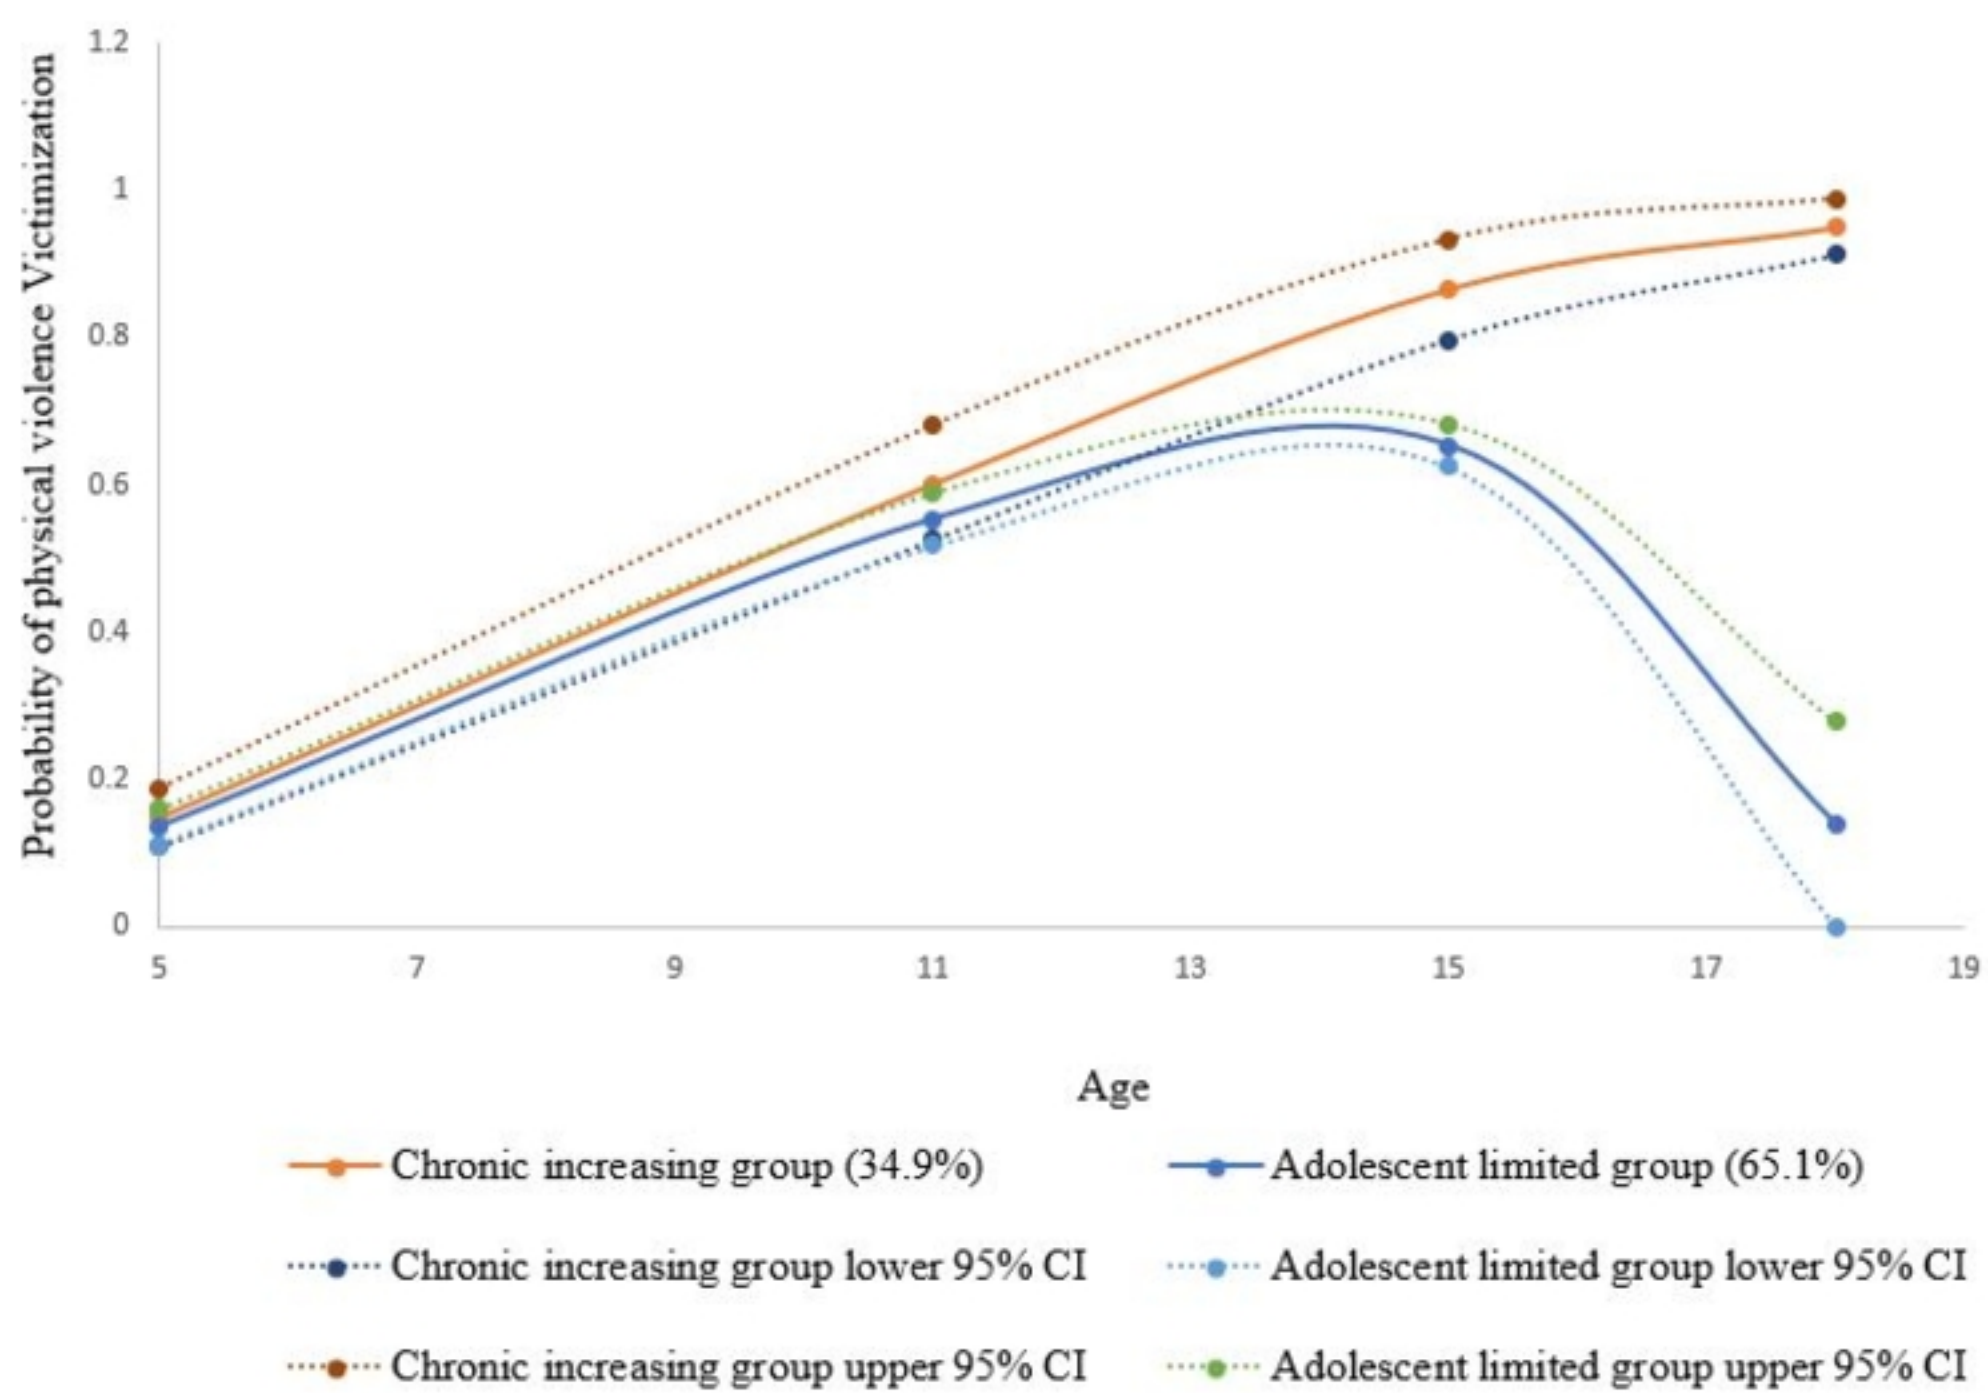

Figure 1

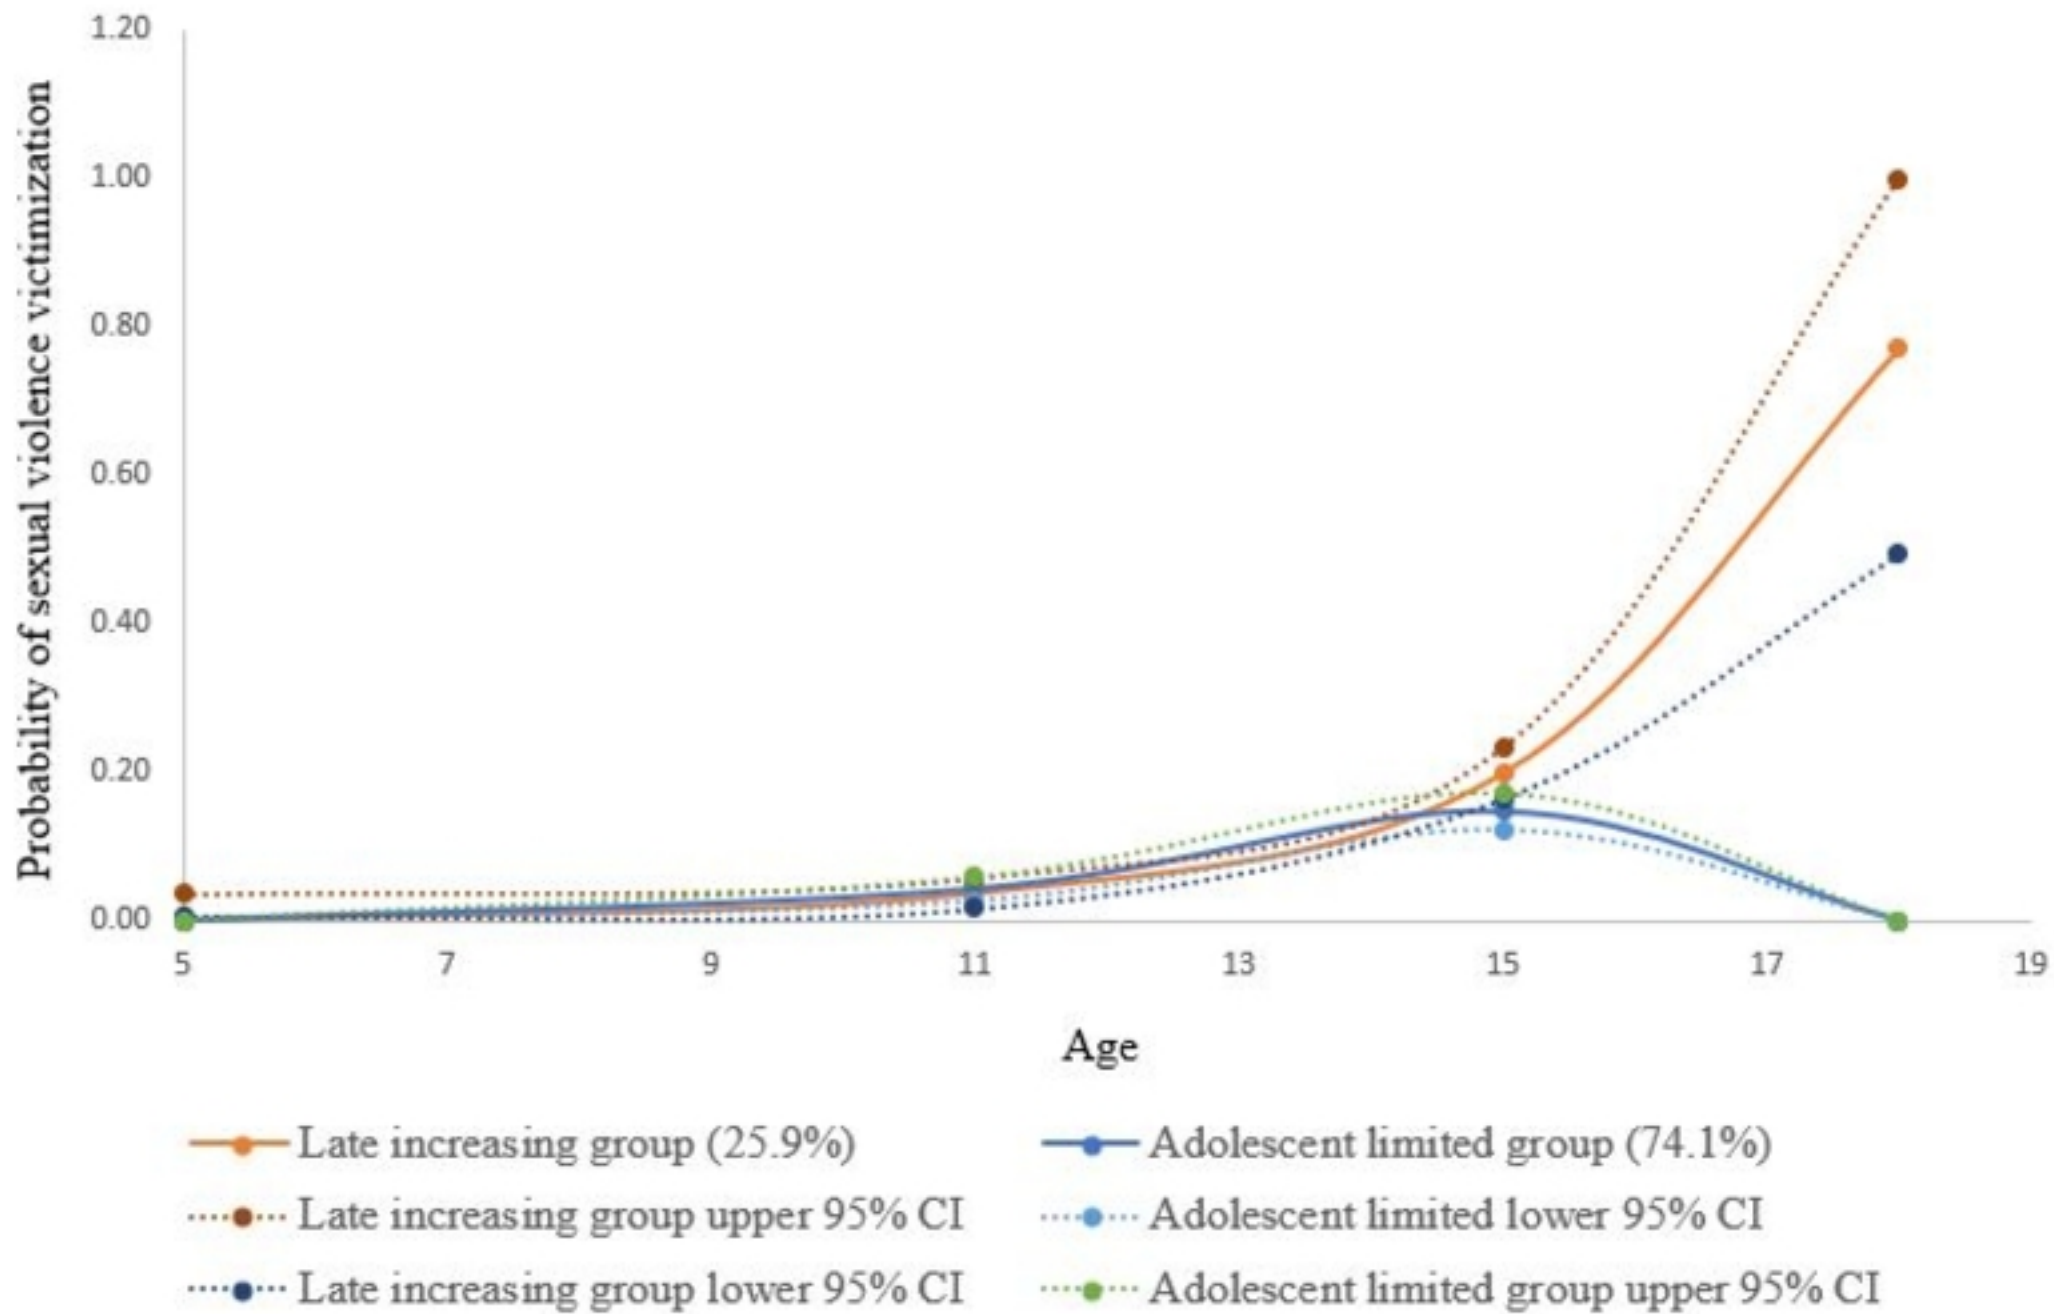

Figure 2
